# Supplementary material
Source: Springer Nature journal article supplement (http://www.springermedizin.de/resource/supplementary/13054_2011_611_MOESM4_ESM.pdf/9708748)

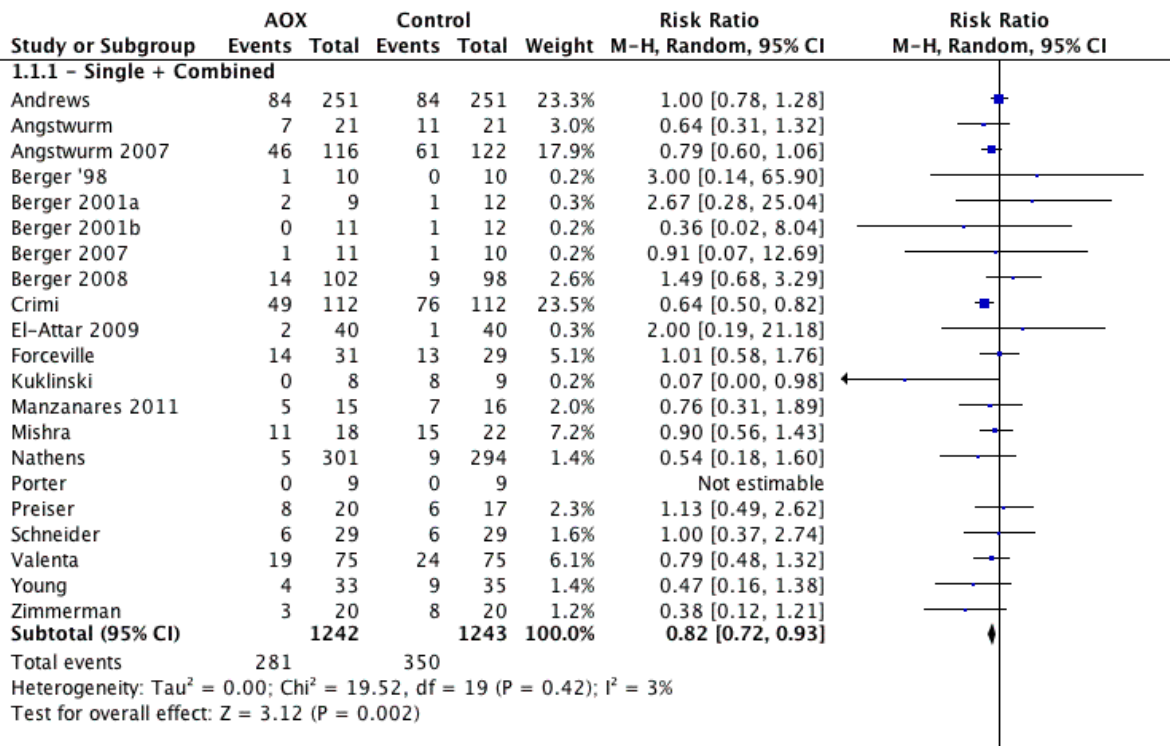

Supplement: MOESM4 [file 9708748]
